# Supplementary material
Source: Research Square preprint supplement (doi:10.21203/rs.3.rs-8449503/v1)

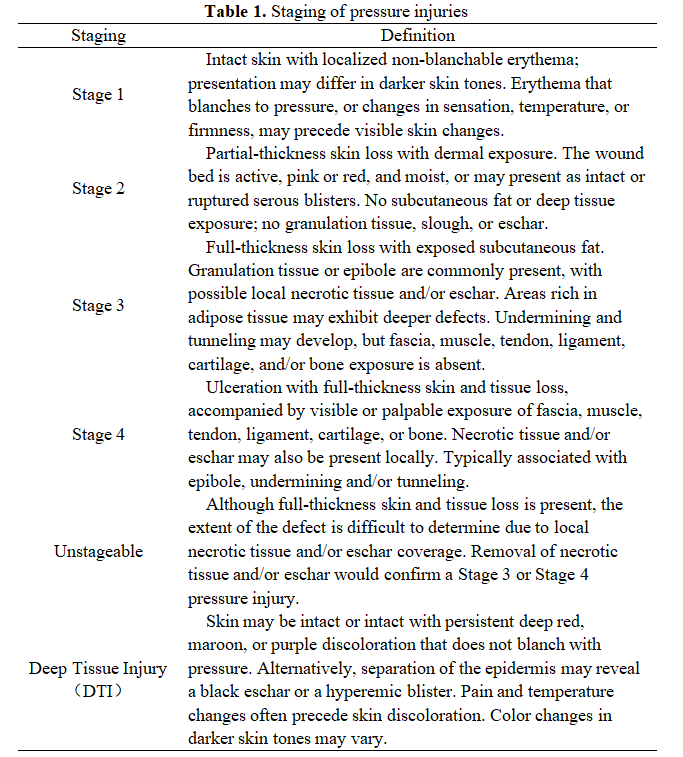

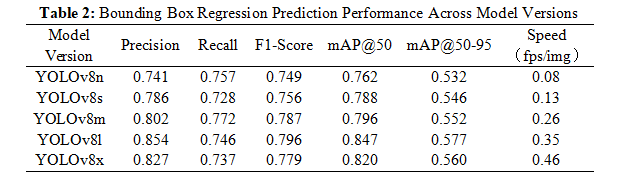

Supplement: Supplementary file 1 [file 0a7f137dd47d9897044c56d7.docx]
